# Supplementary material for: Prevalence and risk factors for myopia and other refractive errors in an adult population in southern India
Source: PubMed Central journal article supplement (PMC6001660; doi:10.1111/opo.12447), 2018-03-25
Supplement: OPO-38-346-s001.pdf [file OPO-38-346-s001.pdf]

**Supplemental Table.** Distribution of presenting and best corrected visual acuity in eyes of people with myopia ( $SE \leq -0.75$  D) categorized by the presence or absence of advanced cataract in the corresponding eye<sup>1</sup>

|                   | Best Corrected VA           |                         |                         |                         |         |              | Best Corrected VA              |                         |                         |                         |         |              |
|-------------------|-----------------------------|-------------------------|-------------------------|-------------------------|---------|--------------|--------------------------------|-------------------------|-------------------------|-------------------------|---------|--------------|
|                   | Eyes with advanced cataract |                         |                         |                         |         |              | Eyes without advanced cataract |                         |                         |                         |         |              |
| Presenting VA     | $\geq 6/12$                 | $<6/12-$<br>$\geq 6/18$ | $<6/18-$<br>$\geq 6/60$ | $<6/60-$<br>$\geq 3/60$ | $<3/60$ | Total        | $\geq 6/12$                    | $<6/12-$<br>$\geq 6/18$ | $<6/18-$<br>$\geq 6/60$ | $<6/60-$<br>$\geq 3/60$ | $<3/60$ | Total        |
| $\geq 6/12$       | 108                         | 0                       | 0                       | 0                       | 0       | 108<br>5.8%  | 203                            | 0                       | 0                       | 0                       | 0       | 203<br>19.1% |
| $<6/12-\geq 6/18$ | 128                         | 29                      | 0                       | 0                       | 0       | 157<br>8.4%  | 163                            | 4                       | 1                       | 0                       | 0       | 168<br>15.8% |
| $<6/18-\geq 6/60$ | 453                         | 269                     | 145                     | 0                       | 0       | 867<br>46.6% | 374                            | 97                      | 18                      | 0                       | 0       | 489<br>46.0% |
| $<6/60-\geq 3/60$ | 109                         | 141                     | 246                     | 5                       | 0       | 501<br>26.9% | 60                             | 47                      | 54                      | 0                       | 0       | 161<br>15.1% |
| $<3/60$           | 13                          | 52                      | 110                     | 12                      | 40      | 227<br>12.2% | 6                              | 15                      | 15                      | 3                       | 3       | 42<br>4.0%   |
| Total Eyes        | 811                         | 491                     | 501                     | 17                      | 40      | 1860         | 806                            | 163                     | 88                      | 3                       | 3       | 1063         |

<sup>1</sup> advanced cataract defined as LOCS III grade of nuclear  $\geq 4$ , cortical  $\geq 3$ , posterior sub-capsular (PSC)  $\geq 2$ , or dense opacities
